# Supplementary material
Source: Springer Nature journal article supplement (https://www.springermedizin.de/resource/supplementary/12913_2013_3740_MOESM5_ESM.pdf/9532248)

**Survey Respondents who would order AChE test?  
(Severe poisoning, Oximes)**

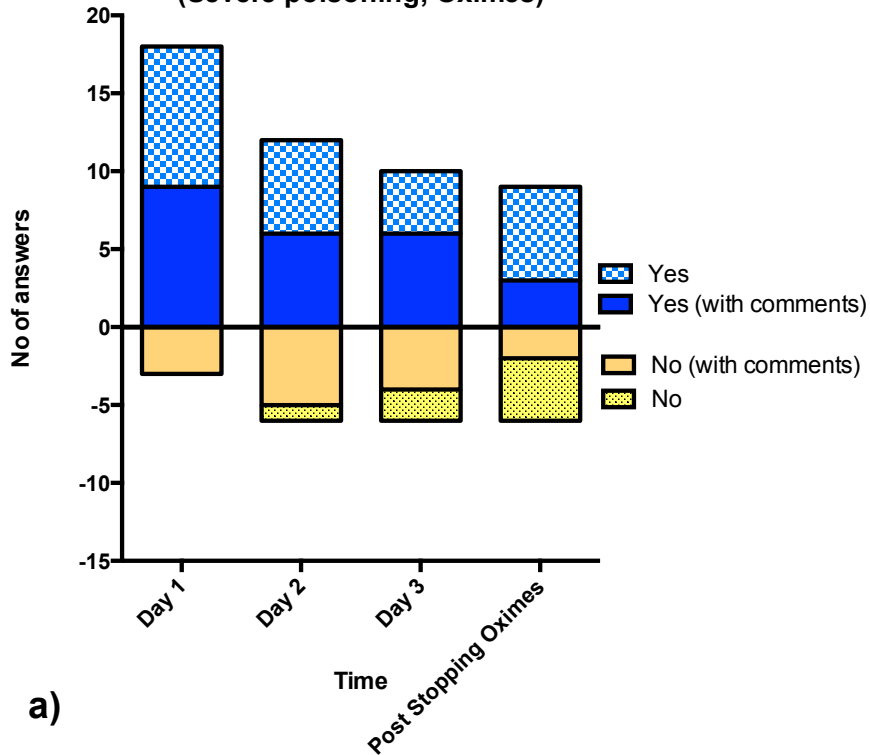

**Survey Respondents who would order AChE test?  
(Mild poisoning, No Oximes)**

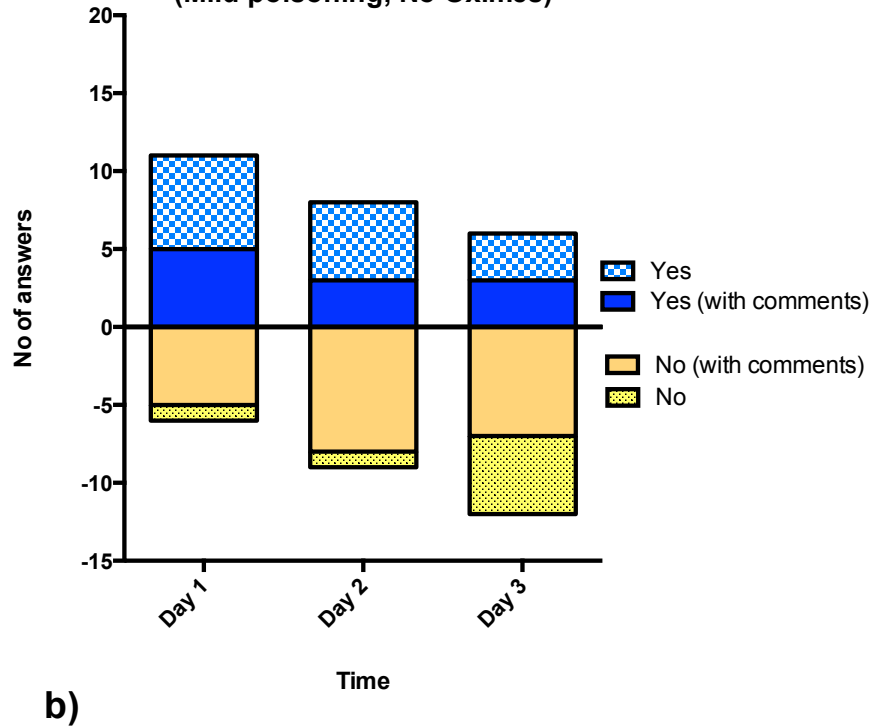

Supplement: MOESM5 [file 9532248]
